# Supplementary material
Source: ML conference proceedings conference paper supplement (https://openreview.net/forum?id=2aIoEG2Hwz)
Supplement: supplementary_material [file README.pdf › supplementary/prediction/README.pdf]

# About Multi-Horizon Goal Prediction Visualization (Sec. 4.4)

This directory contains PNG examples of **Multi-Horizon Goal Prediction Visualization** as described in **Sec.4.4** of the main paper. For a detailed explanation, please refer to **Sec.4.4 in the main paper** and **Sec.B.4 in the supplementary material** ( [supplementary/#0-Supplementary.pdf](#) ).
