# Supplementary material
Source: ML conference proceedings conference paper supplement (https://openreview.net/forum?id=2aIoEG2Hwz)
Supplement: supplementary_material [file README.pdf › supplementary/vis_multi_h/README.pdf]

# About Hierarchical Structure of Learned Concepts (Sec.4.3)

This directory contains PNG examples of **Hierarchical Structure of Learned Concepts** as described in **Sec.4.3** of the main paper. For a detailed explanation and additional examples, please refer to **Sec.4.3 in the main paper** and **Sec.B.3 in the supplementary material** ( [supplementary/#0-Supplementary.pdf](#) ).
